# Supplementary material
Source: Elsevier journal article supplement (https://www.sciencedirect.com/science/article/pii/S0213911118300682)
Supplement: mmc1 [file S0213911118300682:mmc1.docx]

**Apéndice A**

**Formulación analítica del análisis envolvente de datos**

La formulación analítica del análisis envolvente de datos (DEA, *data envelopment analysis*) con rendimientos variables de escala y orientado a *inputs* en su versión envolvente es:


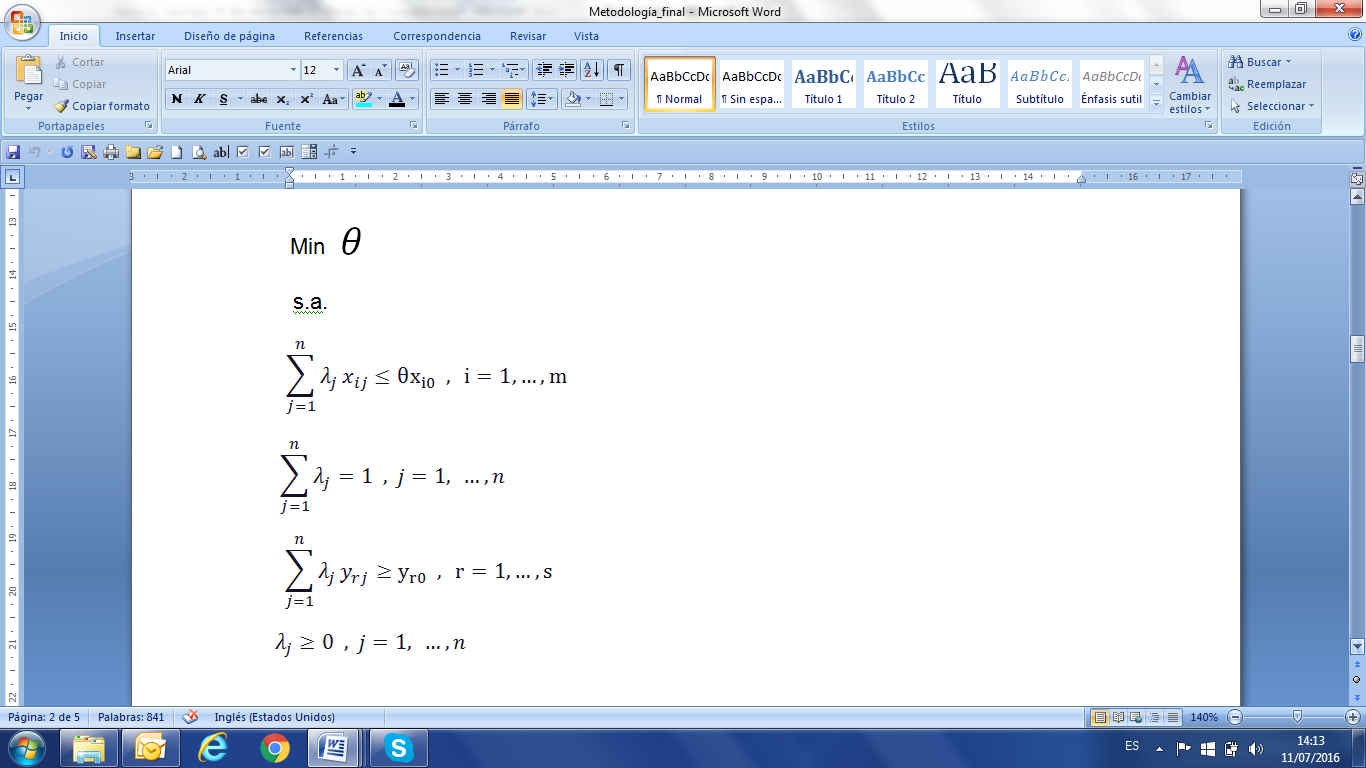


Este programa de optimización está formado por un vector de *n* hospitales constituido por *m* *inputs* y *r outputs,* de forma que:


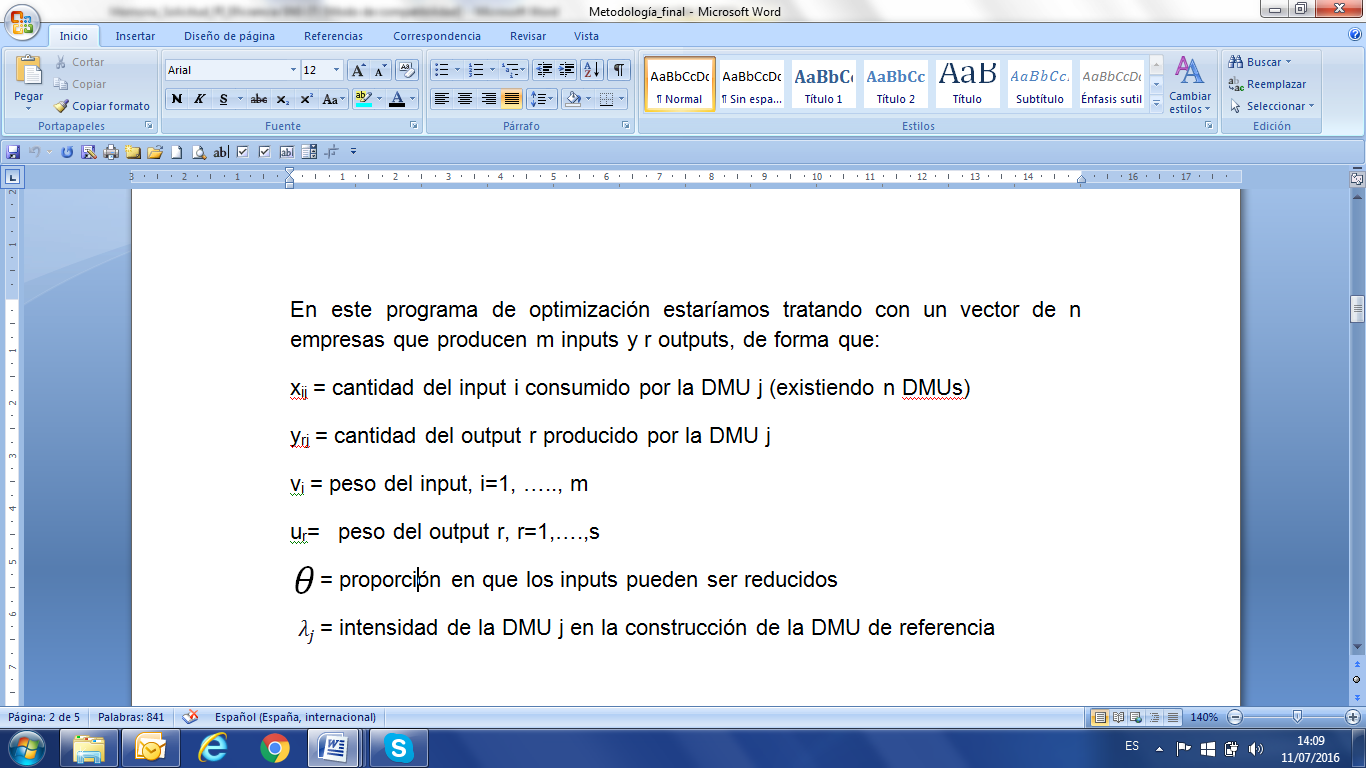


La formulación analítica del DEA con rendimientos constantes de escala se obtiene eliminando la restricción:


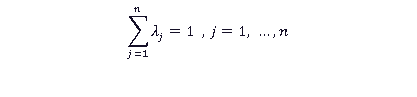


**Apéndice B**

**Formulación analítica del modelo de regresión multinivel**

Para identificar los factores relacionados con la eficiencia técnica, se formula una regresión lineal multinivel con efectos fijos, en la que los hospitales (nivel 1) están agrupados en comunidades autónomas (nivel 2).

El modelo jerárquico de dos niveles establece la relación:

donde *Yij* es el valor de la variable respuesta para el hospital *i,* perteneciente a la comunidad autónoma *j*. Esta variable es modelada como función lineal de las características del hospital de la comunidad autónoma, representadas por *X1,...,Xp,* y dos efectos aleatorios, uno correspondiente al segundo nivel *(uj)* y otro al residual del primer nivel *(eij).* Ambos componentes aleatorios se distribuyen según una normal de media cero y varianza σu2 y σe2, respectivamente.

**Tabla I**

Selección de variables *input-output* del modelo de análisis de eficiencia técnica

|  | **Variable** | **Descripción** |
| --- | --- | --- |
| *Inputs* | Camas instaladas | Es la variable *proxy* del capital más utilizada en la literatura; recoge el promedio anual de la dotación instalada, independientemente de las que hayan estado realmente en funcionamiento o no durante todo el año |
| Compras y servicios exteriores adquiridos | Importe monetario del aprovisionamiento de los hospitales de bienes necesarios para la asistencia sanitaria (compras de productos farmacéuticos y material sanitario de consumo, servicios asistenciales externalizados y trabajos no asistenciales externalizados) |
| Personal | Profesionales contratados en el centro hospitalario, estructurándose este recurso en tres *inputs* diferenciados: personal facultativo, otro personal sanitario y personal no sanitario; se incluye tanto a profesionales contratados a tiempo completo como a tiempo parcial (considerando tiempo parcial el 50%); se excluye el personal en formación y el personal colaborador |
| *Outputs* | Altas totales ajustadas por casuística | Altas hospitalarias ponderadas por su complejidad a través del índice de casuística (también denominado peso medio o *case-mix*), que se define como la media ponderada de los pesos de los grupos relacionados por el diagnóstico de todos los pacientes de un determinado hospital; se calcula multiplicando el número de casos de cada grupo relacionado por el diagnóstico por su peso (pesos españoles) y dividiendo por el número total de casos del hospital |
| Consultas externas | Actos médicos realizados de forma ambulatoria para el diagnóstico, el tratamiento o el seguimiento del paciente. Esta variable integra tanto las consultas externas atendidas en el propio hospital como en sus centros periféricos de especialidades |
| Urgencias no ingresadas | Casos de pacientes atendidos en los servicios de urgencias hospitalarias que, tras ser atendidos, han sido dados de alta por no requerir ingreso; asimismo, esta variable integra las urgencias atendidas que derivaron en alta voluntaria del paciente, traslado a otro centro sanitario o fallecimiento en el propio servicio |
| Procedimientos de cirugía mayor ambulatoria | Procesos subsidiarios de cirugía realizada con anestesia general, local, regional o sedación que no necesitan ingreso hospitalario al considerarse suficiente unos cuidados posoperatorios poco intensivos y de corta duración, de forma que el alta tiene lugar en pocas horas; comprende tanto la cirugía mayor ambulatoria programada como la urgente |

Fuente: elaboración propia.

**Tabla II**

Variables *input-output* de los hospitales generales del Sistema Nacional de Salud español (2010-2012)

|  | **Media** | | | **Variacióna** | **Desviación estándar** | | |
| --- | --- | --- | --- | --- | --- | --- | --- |
|  | 2010 | 2011 | 2012 |  | 2010 | 2011 | 2012 |
| *Inputs* |  |  |  |  |  |  |  |
| Camas instaladas | 412,10 | 411,17 | 405,04 | -1,71 | 345,01 | 341,94 | 333,14 |
| Personal facultativob | 290,53 | 291,19 | 288,00 | -0,87 | 235,12 | 241,01 | 232,08 |
| Otro personal sanitariob | 1.424,55 | 1.387,15 | 1.339,12 | -6,00 | 1.314,40 | 1.293,53 | 1.239,48 |
| Personal no sanitariob | 435,76 | 429,30 | 410,46 | -5,81 | 442,27 | 440,57 | 405,56 |
| Compras y servicios exterioresc | 51.916,23 | 54.256,62 | 55.120,09 | 6,17 | 49.689,19 | 53.112,82 | 53.217,49 |
| *Outputs* |  |  |  |  |  |  |  |
| Altas totales ajustadas por casuísticad | 15.542,23 | 15.554,50 | 15.537,44 | -0,03 | 13.774,37 | 13.666,87 | 13.656,19 |
| Consultas externas | 290.880,27 | 295.460,60 | 291.776,89 | 0,31 | 223.693,08 | 222.401,22 | 217.721,86 |
| Urgencias no ingresadas | 71.438,40 | 72.023,20 | 68.477,03 | -4,15 | 50.154,27 | 50.129,06 | 47.501,09 |
| Procedimientos de cirugía mayor ambulatoria | 3.829,22 | 3.962,86 | 4.114,90 | 7,46 | 3.117,22 | 3.218,28 | 3.310,22 |

a Porcentaje de variación 2010-2012.

b Incluye el número de profesionales a tiempo completo y el número de profesionales a tiempo parcial (considerando la jornada laboral a tiempo parcial el 50%).

c Miles de euros.

d Las altas hospitalarias se han ajustado aplicando el peso español medio (también denominado índice de *case-mix* o índice de casuística). El peso medio se define como la media ponderada de los pesos de los grupos relacionados por el diagnóstico de todos los pacientes de una determinada unidad, grupo o proveedor.

Nota: se incluyen los hospitales de dependencia pública, los hospitales administrados o financiados en su mayor parte por las administraciones públicas, los hospitales de dependencia privada pertenecientes a la Red de Utilización Pública (XHUP) en Cataluña, y además las entidades de dependencia privada que mantienen un concierto sustitutorio, lo que implica que el centro presta toda su oferta asistencial a una población asignada perteneciente al Sistema Nacional de Salud, y donde gran parte de su actividad proviene de este contrato.

Fuente: elaboración propia a partir de las fuentes de información SIAE y CMBD-H, Ministerio de Sanidad, Servicios Sociales e Igualdad, Gobierno de España.

**Tabla III**

Construcción del modelo base y modelos alternativos

|  | **Modelo base** | **Modelo 1** | **Modelo 2** | **Modelo 3** | **Modelo 4** | **Modelo 5** |
| --- | --- | --- | --- | --- | --- | --- |
| *Inputs*  Camas instaladas  Compras y servicios exteriores  Personal facultativo  Otro personal sanitario  Personal no sanitario | X  X  X  X  X | X  -  X  X  X | X  X    X | X  X | X  X  X  X  X | X  X  X  X  X |
| *Outputs*  Altas totales ajustadas  Consultas externas  Urgencias no ingresadas  Procedimientos de cirugía mayor ambulatoria | X  X  X  X | X  X  X  X | X  X  X  X | X  X  X  X | X  -  -  - | X  X  X  - |

Nota: el guión y la llave indican, respectivamente, eliminación y agregación.

Fuente: elaboración propia.

**Tabla IV**

Selección de variables hospitalarias y regionales del análisis de segunda etapa

|  | **Variable** | | **Descripción** |
| --- | --- | --- | --- |
| *Hospitalarias* | Dotación de alta tecnología | | Recoge el equipamiento de diagnóstico por imagen, radioterapia y otros equipos clasificados como tales, en funcionamiento tanto en el propio hospital como en los centros de especialidades de él dependientes |
| Personal en formación | | Incluye a médicos/as residentes (MIR); se excluye de esta variable al resto de profesionales en periodo de formación: enfermería de posgrado, otros internos/as residentes (biólogos/as, químicos/as, etc.) y otro personal en formación de posgrado |
| Altas hospitalarias no financiadas por el Sistema Nacional de Salud | | Altas hospitalarias no financiadas por el Sistema Nacional de Salud, sujetas a las siguientes categorías de régimen económico: particulares, aseguradoras privadas, mutuas de funcionarios, otras entidades públicas, mutuas de accidentes de trabajo y enfermedades profesionales, convenios internacionales, accidentes de tráfico y otro régimen económico externo al Sistema Nacional de Salud |
| Tipo de hospital | Personalidad jurídica | Diferenciación entre hospitales con y sin personalidad jurídica |
| Forma de gestión | Se recogen las siguientes formas de gestión: hospital público sin personalidad jurídica (hospital tradicional), concesión administrativa sanitaria, consorcio, ente de derecho público, ente de derecho público con PFI *(private finance initiative),* fundación público-sanitaria, hospitales privados lucrativos y no lucrativos |
| *Regionales* | Geográfica | Insularidad | Condición de insularidad de la comunidad autónoma en la que se ubica el hospital general |
| Económicas | Gasto per cápita en servicios públicos fundamentales | Los servicios públicos fundamentales incluyen todas las actividades relacionadas con la prestación y la gestión de servicios de salud (asistencia primaria, especializada y hospitalaria, salud pública, investigación clínica), la prestación y la gestión de servicios educativos (infantil, primaria, secundaria, postsecundaria y superior, becas, servicios auxiliares de la educación) y la prestación y la gestión de los servicios de protección social (los derivados de enfermedad e incapacidad, edad avanzada, supervivientes, protección a la familia, desempleo, vivienda y exclusión social) |
| Renta media anual por hogar | La renta anual neta media por hogar proporciona la correspondiente al año anterior al de realización de la entrevista |
| Sociodemográfica | Índice de envejecimiento | El índice de envejecimiento recoge la estructura de población de la región, definido por el cociente entre el número de personas de 65 o más años y el número de personas menores de 15 años |
| Sanitaria | Número de camas privadas respecto a la población | Número de camas instaladas en hospitales privados lucrativos y no lucrativos respecto al total de camas instaladas en hospitales públicos y privados de la región |

Fuente: elaboración propia.
